# Supplementary material
Source: PubMed Central journal article supplement (PMC4000857)
Supplement: 1322190111_pnas.201322190SI.pdf [file 1322190111_pnas.201322190SI.pdf]

# Supporting Information

Lang et al. 10.1073/pnas.1322190111

## SI Materials and Methods

**Yeast Strains and Culture Conditions.** Yeast strains (Table S1) were obtained from C. P. Kurtzman and J. Swezey (National Center for Agricultural Utilization Research, Peoria, IL) and R. A. Zvyagilskaya (Bach Institute of Biochemistry, Moscow, Russia). Yeast cells were cultivated at 28 °C in liquid YM [0.3% (wt/vol) yeast extract (Difco), 0.3% (wt/vol) malt extract, 0.5% (wt/vol) peptone (Difco)] or YP [1% (wt/vol) yeast extract (Difco), 2% (wt/vol) peptone (Difco)] media containing either 1% (wt/vol) glucose or 2% (wt/vol) galactose as the sole carbon source. For substrate utilization test, yeasts were grown on synthetic medium [0.67% (wt/vol) Yeast Nitrogen Base without amino acids (Difco), 2% (wt/vol) agar (Difco)] with either 1% (wt/vol) glucose, 3% (vol/vol) glycerol, 3% (vol/vol) ethanol, or, alternatively, 2% (vol/vol) lactate, as the sole carbon source.

**DNA Purification and Sequencing.** Mitochondrial DNA from the *Magnusiomyces magnusii* strain 270 was prepared from DNase I-treated mitochondria as described previously (1), following which a shotgun library of mtDNA fragments was constructed and sequenced by the dideoxy-chain termination method on double-stranded plasmid templates (2). For the other magnusiomycete strains, total cellular DNA was isolated essentially as described earlier (3), purified using DNeasy Blood and Tissue kit (Qiagen), and sequenced, along with nuclear DNA, by Macrogen using Illumina HiSeq 2000 and paired-end (2 × 100 nt) technology. About 4–13 Gbp of raw data (QV20 > 95%) was obtained per sample, and low-quality reads were filtered and trimmed with tools developed in-house and assembled with Velvet (version 1.1.06) using a k-mer size of 81 (*Magnusiomyces capitatus*) or 61 (remaining species) (4). Contigs corresponding to mtDNAs were manually curated using the Geneious package v5.6.6 (Biomatters). Read mapping to assembled contigs was performed with Geneious at standard settings (medium sensitivity/read mapping).

**Mitochondrial Genome Annotation.** Gene annotation of *Magnusiomyces* mtDNAs was performed with the automated tool MFannot (<http://megasun.bch.umontreal.ca/cgi-bin/mfannot/mfannotInterface.pl>) developed in-house. In brief, MFannot predicts group I and II introns, tRNAs, RNase P-RNA, and 5S rRNA with Erpin as a search engine (5), based on RNA structural profiles established by us. Exons of protein-coding genes are inferred in a first round with Exonerate (6), and then for less well-conserved genes with HMMER (7), based on models for all known mtDNA-encoded proteins. Only sequence positions that are aligned with confidence are retained for model construction. Miniexons (as short as 3 nt) that are not resolved by Exonerate, but inferred by the presence of orphan introns, are detected as missing protein regions in multiple protein alignments. The precise placement of small exons is based on the best fit of HMM protein profiles and on the fit with conserved nucleotide sequence profiles of group I or II exon-intron boundaries. Genes encoding the small and large subunit rRNAs are predicted with HMM profiles covering the most highly conserved domains, allowing precise placement of the small subunit rRNA termini, but only approximate positioning of large subunit rRNA ends. The latter termini, as well as precise exon-intron boundaries of rRNA genes, are predicted manually using comparative-structure modeling and experimentally determined processing sites in *M. magnusii* strain 270 (see *Mapping of rRNA Termini in M. magnusii*). Automated annotations are complemented by manual analyses to account for MFannot warnings

(e.g., potential transspliced genes, gene fusions, frameshifts, alternative translation initiation sites, failure to identify mini-introns, etc.), correct potential errors, and find features that are not (yet) recognized by automated procedures. In the case of *M. capitatus*, byp insertions were identified with TFASTA (8), by using protein sequences from other *Magnusiomyces* strains without byps. Only insertions that follow the conserved byp features (matching takeoff and landing sites; avoided codon and RNA hairpin structure following the takeoff site; and reconstitution of bona fide translation of a functional protein sequence without insertion) were annotated as such.

**LacZ Constructs of Byps and Expression in *Escherichia coli*.** The elements *nad4L*-byp1 and *cox1*-byp1 and mutated versions thereof were directionally inserted into the *lacZ* gene of the *E. coli* cloning vector pUC19. Briefly, PCR primer pairs where designed whose 3' portions anneal with the vector's multicloning site in divergent orientation and whose 5' portions cover the 3' half and the 5' half, respectively, of the byp element. Primer sequences (5' to 3') are as follows: primer puc19-a (control), TCACTGGCCGTCGTTTACAACG; primer puc19-b (control), ATTCGAGCTCGGTACCCGG; primer puc19-1 (landing), ATCCCTAATAGGGGAT-TATTATTATAAAAAATTTTAAAGGTTCACTGGCCGTCGTTTACAACG; primer puc19-2 (take-off), TATTATCGTCT-ATTAATAATAATAATAAAAAAATTGTTACCATATTCGAGCTCGGTACCCGG; Primer puc19-3 (CGA → TGA), TATTATCATCTATTAATAATAATAAAAAAATTGTTACCATATTCGAGCTCGGTACCCGG; primer puc19-4 (CGA → TGA, no prepeptide), TATTATCATCCATTCGAGCTCGGTACCCGG; and primer puc19-5 (tetraloop, SD), ATCCCCTTCGGGGATTATTATTAAGAGATTTAAAGGTTCACTGGCCGTCGTTTACAACG.

Primer pairs were puc19-a plus puc19-b; puc19-1 plus puc19-2; puc19-1 plus puc19-3; puc19-1 plus puc19-4; and puc19-5 plus puc19-3. The vector served as amplification template. Ligation of the amplicon generates a plasmid with the byp element inserted in the multicloning site. The control experiment used primers without byp-sequence additions. The ligation protocol involves end repair with a mixture of 2 U each of Klenow DNA polymerase and T7 DNA polymerase, and ligation with 0.6 units T4 DNA Ligase in the presence of 5 U T4 polynucleotide kinase. Competent *E. coli* cells were transformed with ligation products and incubated on agar plates containing isopropyl β-D-1-thiogalactopyranoside (IPTG) and Xgal (9). Purified plasmids isolated from both blue and white recombinant colonies were analyzed by Sanger sequencing.

**In Silico Search for Byps.** Byp sequences were aligned with Muscle version 3.6 (10). The resulting multiple alignment was manually curated for optimal fit of primary sequence and secondary structure predicted by RNAalifold (11). For manual curation, visualization, editing, and reformatting of sequence alignments, we used the GDE sequence editor (12). A modified GDE version that works in current 64-bit Linux environments, together with the appropriate libraries, is available on request. Byps were searched for with covariance models (CMs), based on the alignment of UCC and CGA byps in regular mitochondrial protein genes of *M. capitatus*. To improve search sensitivity, two models per byp group were constructed, using the cmbuild and cmcalibrate tools that are included in the Infernal package (version 1.1rc1) (7). For a given byp group, the first CM contains all sequences, and the second contains those byps that are not found by the first model

(note that byps are short and poorly conserved at the sequence level). Only confidently aligned nucleotides were used for model building and searching, by applying the  $-hand$  option. Searches were performed with a cutoff E-value of 0.01.

**Mitochondrial RNA Isolation and Transcript Analysis by RT-PCR.** Mitochondria were isolated from a 1-L culture of *M. capitatus* cells grown in YM with 2% (wt/vol) galactose at 28 °C as described in ref. 13 and further purified by a flotation gradient (14), with the modifications described earlier (15). RNA was then extracted using the RNeasy Mini kit (Qiagen) treated with DNase I, and used for cDNA synthesis using the RevertAid H Minus First Strand cDNA synthesis kit (Thermo Scientific) and random hexamer primers. The cDNA was used as a template in PCR reactions using gene-specific primer pairs: for *cob* (primer sequences are given in 5' to 3' direction), ATGGCATTACGTA-AAAAGAATGAA and CTATTTACTTTGTTGTTCCAATAT-AGAA; for *cox1*, ATGGTAAATAGTAAATTTAAACAA and TTATGATTGTAAAGCTGGACT; for *nad2*, ATGTTAGTATTAGGTACATTAA and AAAGTATTGTTAAATTAAC-AT; for *nad3*, ATGTTTAATTTTAAACAATACTTT and TTA-TGAATATAAACTTAAATAATGAT; and for *rps3*, ATGAA-AAGAGAAATATTAATAATC and TTATAAATGACCTAAT-TGAATTT. Primers anneal with the 5' and 3' regions of genes. The reactions contained 0.3  $\mu$ L of cDNA, 0.5  $\mu$ M upstream and downstream primers, 0.2 mM dNTPs each, 1 $\times$  reaction buffer containing 2 mM MgCl<sub>2</sub>, and 1 U of *DreamTaq* DNA polymerase (Fermentas), and were performed using the following cyclers profiles: for *cob* [3 min at 95 °C; 29 $\times$  (45 s at 94 °C, 45 s at 56 °C, 4 min at 72 °C); 3 min at 72 °C]; *cox1* [3 min at 95 °C; 29 $\times$  (45 s at 94 °C, 45 s at 52 °C, 2 min at 72 °C); 3 min at 72 °C]; *nad2* [3 min at 95 °C; 29 $\times$  (45 s at 94 °C, 45 s at 49 °C, 2 min at 65 °C); 3 min at 65 °C]; *nad3* [3 min at 95 °C; 29 $\times$  (45 s at 94 °C, 45 s at 50 °C, 45 s at 72 °C); 3 min at 72 °C]; and *rps3* [3 min at 95 °C; 29 $\times$  (45 s at 94 °C, 45 s at 52 °C, 1.5 min at 65 °C); 3 min at 65 °C]. Three control PCR reactions were performed using the following templates: (i) genomic DNA (positive control), (ii) mitochondrial RNA treated with DNase I, and (iii) cDNA prepared from mitochondrial RNA treated with DNase I and RNase A (negative control). PCR products were electrophoretically

separated in a 1% agarose gel. RT-PCR products of *cob* (1.20 kbp) and *cox1* (1.71 kbp) were sequenced. The other RT-PCR products, which cover regions without introns, were identified by size, which was identical with the size of the PCR product amplified from the genomic DNA: i.e., 2.10 kbp (*nad2*), 0.49 kbp (*nad3*), and 1.35 kbp (*rps3*). Equal size indicates that the byp elements were not spliced out of the mRNA.

**Mapping of rRNA Termini in *M. magnusii*.** The termini of mitochondrial large and small rRNAs of the *M. magnusii* strain 270 were mapped using an RNA circularization procedure (16). The regions containing ligated rRNA termini were amplified by RT-PCR using the following primer pairs (primer sequences are given in 5' to 3' direction): GATTATTCACCTACTACCT, TCCT-CTAATGAACAAAATCC (*ms*); and ATCTTGGTTATTTT-CCTTTCCTTA, CGACTCTACTTATCCTACTGGTG (*rnl*). Amplicons were cloned using the PCR cloning kit (Qiagen) and sequenced. Sequences of the identified rRNA termini are conserved across the analyzed Magnusiomyces.

**Identification of Mitochondrial Proteins by Mass Spectrometry.** Mitochondria from a 1-L yeast culture (*M. capitatus* and *Saccharomyces cerevisiae* FY1679; grown on YM medium with galactose; see *Yeast Strains and Culture Conditions*) were solubilized in a buffer containing 20 mM Hepes/KOH, (pH 7.4), 60 mM NH<sub>4</sub>Cl, 10 mM MgCl<sub>2</sub>, 0.5 mM EDTA, 1 mM PMSF, and digitonin [2% (wt/wt) protein], followed by incubation on ice for 30 min and homogenization in a Potter homogenizer. After centrifugation at 18,000  $\times$  g for 15 min, the supernatant was collected, and ~150  $\mu$ g of protein was electrophoretically separated for 30 min (4–14% Blue Native Poly-Acrylamide Gel Electrophoresis; Hoefer apparatus with an 18  $\times$  16-cm electrophoresis chamber; 140 V and 9 mA). The preparation of BN-PAGE gels, electrophoresis buffer, and samples followed previously published procedures (17). The protein-containing zone was cut out of the gel and submitted to a proteomics service (Institute for Research in Immunology and Cancer technology platform, Université de Montréal) for destaining, reduction, alkylation, tryptic digestion, liquid chromatography tandem mass spectrometry (LC-MS/MS) (18, 19), and peptide annotation by Mascot (20).

- Griac P, Nosek J (1993) Mitochondrial DNA of *Endomyces (Dipodascus) magnusii*. *Curr Genet* 23(5-6):549–552.
- Burger G, Lavrov DV, Forget L, Lang BF (2007) Sequencing complete mitochondrial and plastid genomes. *Nat Protoc* 2(3):603–614.
- Philippson P, Stotz A, Scherf C (1991) DNA of *Saccharomyces cerevisiae*. *Methods Enzymol* 194:169–182.
- Zerbino DR, Birney E (2008) Velvet: Algorithms for de novo short read assembly using de Bruijn graphs. *Genome Res* 18(5):821–829.
- Gautheret D, Lambert A (2001) Direct RNA motif definition and identification from multiple sequence alignments using secondary structure profiles. *J Mol Biol* 313(5):1003–1011.
- Slater GSC, Birney E (2005) Automated generation of heuristics for biological sequence comparison. *BMC Bioinformatics* 6:31.
- Eddy SR (2008) HMMER: Biological Sequence Analysis Using Profile Hidden Markov Models, Version 3.0. Available at <http://hmmer.janelia.org>.
- Pearson WR (2000) Flexible sequence similarity searching with the FASTA3 program package. *Methods Mol Biol* 132:185–219.
- Sambrook J, Fritsch EF, Maniatis T (1989) *Molecular Cloning: A Laboratory Manual* (Cold Spring Harbor Lab Press, Cold Spring Harbor, NY), 2nd Ed.
- Edgar RC (2004) MUSCLE: A multiple sequence alignment method with reduced time and space complexity. *BMC Bioinformatics* 5:113.
- Bernhart SH, Hofacker IL, Will S, Gruber AR, Stadler PF (2008) RNAalifold: Improved consensus structure prediction for RNA alignments. *BMC Bioinformatics* 9:474.
- Smith SW, Overbeek R, Woese CR, Gilbert W, Gillet PM (1994) The genetic data environment an expandable GUI for multiple sequence analysis. *Comput Appl Biosci* 10(6):671–675.
- Tomáška L, Nosek J, Fukuhara H (1997) Identification of a putative mitochondrial telomere-binding protein of the yeast *Candida parapsilosis*. *J Biol Chem* 272(5):3049–3056.
- Lambowitz AM (1979) Preparation and analysis of mitochondrial ribosomes. *Methods Enzymol* 59:421–433.
- Newman SM, Zelenaya-Troitskaya O, Perlman PS, Butow RA (1996) Analysis of mitochondrial DNA nucleoids in wild-type and a mutant strain of *Saccharomyces cerevisiae* that lacks the mitochondrial HMG box protein Abf2p. *Nucleic Acids Res* 24(2):386–393.
- Yokobori S, Pääbo S (1995) Transfer RNA editing in land snail mitochondria. *Proc Natl Acad Sci USA* 92(22):10432–10435.
- Daoud R, Forget L, Lang BF (2012) Yeast mitochondrial RNase P, RNase Z and the RNA degradosome are part of a stable supercomplex. *Nucleic Acids Res* 40(4):1728–1736.
- Wessels HJ, et al. (2009) LC-MS/MS as an alternative for SDS-PAGE in blue native analysis of protein complexes. *Proteomics* 9(17):4221–4228.
- Fandiño AS, et al. (2005) LC-nanospray-MS/MS analysis of hydrophobic proteins from membrane protein complexes isolated by blue-native electrophoresis. *J Mass Spectrom* 40(9):1223–1231.
- Perkins DN, Pappin DJ, Creasy DM, Cottrell JS (1999) Probability-based protein identification by searching sequence databases using mass spectrometry data. *Electrophoresis* 20(18):3551–3567.



```

rps3-byp1 MKREILKSIV...
nad4L-byp1 MVTIFLLFLIG...
nad4L-byp2 MVTIFLLFLIGLIG...
nad2-byp1 MLVLGTLILILSTFNLKTIKE...
nad3-byp1 MFNFNNTLYIFILIPVGLA...
rps3-byp2 MKREILKSIVIKLIWTKIYQIKE...
nad6-byp1 MWLIELINTHFQMNNTIIILFEFLSILSA...
rps3-byp3 MKREILKSIVIKLIWTKIYQIKEIINKNLG...
nad4-byp1 MGLYIIILGFLSIIIGINNKDIIITSIWPKLIRQLSLILSV...
cox1-byp1 MVNSKFKQFVTRWLFSTNCKDIIVLYMIFAIIFSGLIGTG...
cox3-byp1 MNKSNIMLNIRQNYQLHPFHLVENSPPWFFSFLFGLAMNTALTSHGYIQSS...
nad5-byp1 MIFITIFLPILGSLSGLLRSRISGRSYTISWMTFNPKWGSIATSTIVIAALFSYIYFDVIV...

```

**Fig. S2.** Inferred nascent peptide sequences immediately upstream of byp takeoff sites. Shown are sequences inferred from the regions upstream of the most 5' byp in mtDNA-encoded protein genes of *M. capitatus*. The sequences start at the predicted translation initiation codon and end with the takeoff codon of the corresponding byp. The nascent peptides upstream of byps do not have recognizable patterns of positively charged amino acids or other positional motifs conserved throughout prepeptide sequences.

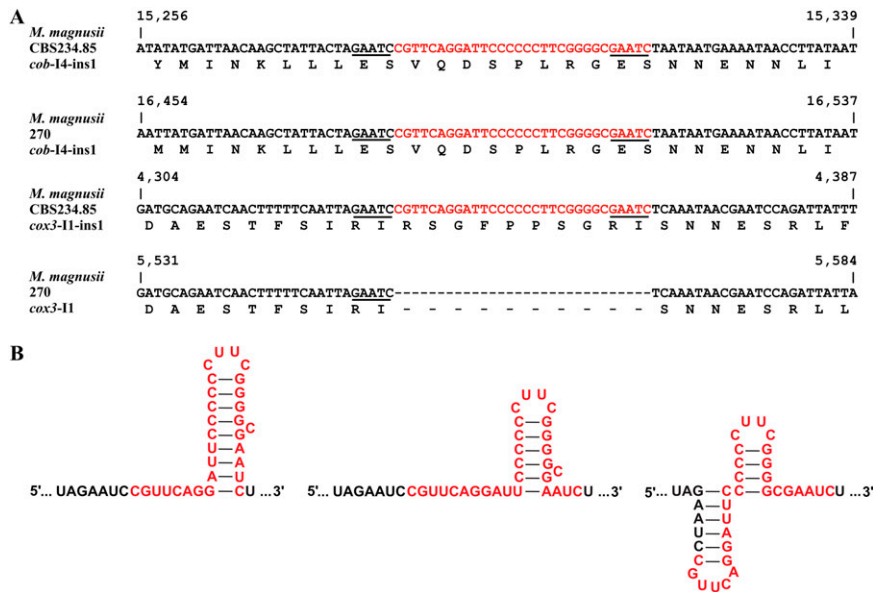

**Fig. S3.** Byp-like insertions in intron ORFs of *M. magnusii* strains. CM search of byps in the mtDNA sequences of *M. magnusii* strains CBS234.85 and 270 revealed several byp-like elements in intron ORFs. (A) Sequence alignment of intron ORFs containing identical byp-like inserts that do not introduce frameshifts or stop codons. For comparison, the *M. magnusii* 270 *cox3-11* ORF sequence without a byp-like element is shown, delineating the insertions. Note that *cob-14-ins1* and *cox3-11-ins1* have identical nucleotide sequences, but that the elements are in different reading frames and therefore translated into different amino acid sequences. A flanking upstream pentanucleotide motif "GAATC" (underlined) is duplicated at the 3' end of all three byp-like insertions. An analysis of codon use of *M. magnusii* genes indicates that this species has by far a less extreme codon avoidance (Table S7) than *M. capitatus* (Table S3) and that these elements may be translated, although less effectively because several codons are used only rarely. Only strain CBS 234.85, but not strain 270, contains an element in the *cox3-11* ORF. Therefore, we assume that this element results from a recent transposition event. (B) Alternative RNA folding of the byp-like sequence (red) and flanking nucleotides (black) from *cob-14-ins1* and *cox3-11-ins1* of the above *M. magnusii* strains. Note that the variant with a double hairpin structure closely resembles double hairpin elements, which are present in fungal mitochondrial genomes, including *Allomyces macrogynus* (1) and *Schizosaccharomyces octosporus* (2).

- Paquin B, Laforest MJ, Lang BF (2000) Double-hairpin elements in the mitochondrial DNA of *Allomyces*: Evidence for mobility. *Mol Biol Evol* 17(11):1760–1768.
- Bullerwell CE, Leigh J, Forget L, Lang BF (2003) A comparison of three fission yeast mitochondrial genomes. *Nucleic Acids Res* 31(2):759–768.









**Table S1. *Magnusiomyces* strains used in this study**

| Species               | Strain                       | Origin*<br>(year; country;<br>substrate)                       | mtDNA<br>size, bp | G+C content,<br>% | Noncoding<br>intergenic<br>sequence, % | No. of mapped<br>reads | GenBank<br>acc. no. |
|-----------------------|------------------------------|----------------------------------------------------------------|-------------------|-------------------|----------------------------------------|------------------------|---------------------|
| <i>M. capitatus</i>   | CBS 197.35<br>(NRRL Y-17686) | 1935; Sweden; wood pulp                                        | 43,486            | 24.2              | 21.8                                   | 8,920,467              | KJ459952            |
| <i>M. ingens</i>      | CBS 521.90<br>(NRRL Y-17630) | 1990; South Africa; wine cellar                                | 37,684            | 20.3              | 16.9                                   | 6,918,467              | KJ459950            |
| <i>M. magnusii</i>    | CBS 234.85                   | 1985; Pennsylvania; slime flux in<br><i>Quercus alba</i>       | 42,757            | 38.2              | 13.3                                   | 10,852,529             | JQ236859            |
| <i>M. magnusii</i>    | 270                          | Unknown                                                        | 40,657            | 38.2              | 14.0                                   | n/a                    | KJ459953            |
| <i>M. tetrasperma</i> | CBS 765.70<br>(NRRL Y-7288)  | 1970; California; wet conveyor<br>at a prune dehydration plant | 44,469            | 48.7              | 40.0                                   | 4,596,067              | KJ459951            |

\*Fungal Biodiversity Centre at [www.cbs.knaw.nl/](http://www.cbs.knaw.nl/). *M. ingens*, *Magnusiomyces ingens*; *M. tetrasperma*, *Magnusiomyces tetrasperma*.



Table S2. Byps in mitochondrial genes and intron ORFs of *Magnusiomyces capitatus*

| Byp location | Byp name                      | Frameshift | Stop codons | Size, nt | Hairpin | Takeoff codon | Avoided codon | Landing codon | Genomic sequence [TAKEOFF CODON/byp sequence including landing codon/NEXT TRANSLATED CODON] |
|--------------|-------------------------------|------------|-------------|----------|---------|---------------|---------------|---------------|---------------------------------------------------------------------------------------------|
| <i>atp6</i>  | <i>atp6-byp1<sup>Δ</sup></i>  | —          | —           | 33       | +       | GGA           | <b>UCC</b>    | GGU           | GGA <b>UCC</b> ccccaactatggtgggtatatactcaactggtATT                                          |
|              | <i>cob-byp1</i>               | +          | —           | 41       | +       | GGA           | <b>CGA</b>    | GGA           | GGA <b>CGA</b> cacctctatagagtgatataaaatttaaattgaaAAT                                        |
|              | <i>cox1-byp1</i>              | —          | +           | 36       | +       | GGU           | CGG           | GGA           | GGT <b>GGG</b> cccctcttggggccgtaacccacctcgggTTA                                             |
|              | <i>cox1-byp2</i>              | +          | —           | 41       | +       | GGA           | <b>CGA</b>    | GGA           | GGA <b>CGA</b> tccaactttgagttggattttaaattttaaattgaaTTA                                      |
|              | <i>cox3-byp1</i>              | +          | —           | 38       | +       | AGC           | <b>CGA</b>    | AGU           | AGC <b>CGA</b> ttaccctttgagtggtggttttttaactttagTATT                                         |
|              | <i>cox3-byp2</i>              | —          | +           | 45       | +       | GGA           | <b>CGA</b>    | GGA           | GGA <b>CGA</b> tccaactcttaggaggttggattataaaataaatttaggaATT                                  |
|              | <i>cox3-byp3</i>              | —          | +           | 33       | +       | GGA           | <b>UCC</b>    | GGA           | GGA <b>UCC</b> cccctcttggggggtatccctaaaggATT                                                |
|              | <i>nad1-byp1</i>              | +          | +           | 34       | +       | GGA           | <b>UCC</b>    | GGA           | GGA <b>UCC</b> atcttagtagatgggaaataataggaATT                                                |
|              | <i>nad1-byp2</i>              | +          | —           | 37       | +       | GUA           | <b>UCC</b>    | GUA           | GTA <b>UCC</b> accctttttaggggtggtatcttcttgaAGA                                              |
|              | <i>nad1-byp3</i>              | +          | —           | 40       | +       | UUC           | <b>UCC</b>    | UUC           | TTC <b>UCC</b> cccctttttaggggtggtggtacacctaaatcACT                                          |
| <i>nad2</i>  | <i>nad2-byp1</i>              | +          | +           | 34       | +       | GAA           | <b>UCC</b>    | GAA           | GAA <b>UCC</b> ccacataatagtggggaataacacctgaaGTT                                             |
|              | <i>nad2-byp2</i>              | +          | +           | 32       | +       | GAU           | <b>CGA</b>    | GAU           | GAU <b>CGA</b> ccaatttttaaatggtcataaaaagatTTT                                               |
|              | <i>nad2-byp3*</i>             | +          | —           | 50       | +       | <b>CGU</b>    | <b>UCC</b>    | <b>CGU</b>    | GCT <b>UCC</b> cccctctcttaaggtgagtggtttaaataataagttAAA                                      |
|              | <i>nad2-byp4</i>              | —          | +           | 36       | +       | GAG           | <b>UCC</b>    | GAA           | GAG <b>UCC</b> cattatggttaagccataatggttataatgaaTTA                                          |
|              | <i>nad2-byp5</i>              | —          | +           | 37       | +       | GGG           | <b>UCC</b>    | GGU           | GGG <b>UCC</b> cccctcttagggtgggaaataataaatggTTA                                             |
|              | <i>nad2-byp6</i>              | +          | +           | 42       | +       | GGC           | <b>UCC</b>    | GGU           | GGC <b>UCC</b> catatccatatacggtatgaggtttaaataaaaagtTCA                                      |
|              | <i>nad2-byp7</i>              | +          | —           | 37       | +       | GGC           | CUC           | GGU           | GCC <b>UCC</b> cccctttttagggggagggcaatcccaaggTTA                                            |
|              | <i>nad2-byp8</i>              | +          | —           | 38       | +       | GGA           | <b>CGA</b>    | GGU           | GGA <b>CGA</b> tcaactttataggtgaattgttattataaggtTAT                                          |
|              | <i>nad2-byp9</i>              | +          | +           | 35       | +       | GUU           | <b>UCC</b>    | GUA           | GTT <b>UCC</b> cccctttttaaagggtataataatagtaAAT                                              |
|              | <i>nad2-byp10</i>             | —          | +           | 48       | +       | GGA           | <b>CGA</b>    | GGU           | GGA <b>CGA</b> ttacccttataagggataattaaataataggTTA                                           |
| <i>nad3</i>  | <i>nad2-byp11<sup>Δ</sup></i> | —          | —           | 39       | +       | GGA           | <b>CGA</b>    | GGA           | GGA <b>CGA</b> ccatcttttagatgctgataaaaaatttgggTTA                                           |
|              | <i>nad3-byp1</i>              | +          | +           | 49       | +       | GCU           | <b>UCC</b>    | GCA           | GCT <b>UCC</b> cccctttttagagtggggtttaaacttttttagaagtcaTTA                                   |
|              | <i>nad3-byp2</i>              | +          | —           | 40       | +       | GAA           | <b>CGA</b>    | GAA           | GAA <b>CGA</b> ttaactccttttaggggatactcttttattggaaGTT                                        |
|              | <i>nad4-byp1</i>              | —          | +           | 36       | +       | GUG           | <b>UCC</b>    | GUA           | GTC <b>UCC</b> ccaatttataatggcaataaaaaattccgtaATA                                           |
|              | <i>nad4-byp2</i>              | —          | +           | 39       | +       | AGU           | <b>CGA</b>    | AGU           | AGT <b>CGA</b> cttaaactaataaagggttaagttgaaataaaaaaggTATC                                    |
|              | <i>nad4-byp3</i>              | —          | +           | 30       | +       | GGA           | <b>UCC</b>    | GGA           | GGA <b>UCC</b> ccccttaggggggttttcccttaggaATA                                                |
|              | <i>nad4-byp4</i>              | +          | +           | 44       | +       | GGA           | <b>CGA</b>    | GGA           | GGA <b>CGA</b> ccaactcttagaggtggatgtaaaaaataaaaaagggaATA                                    |
|              | <i>nad4-byp5</i>              | +          | —           | 32       | +       | GGU           | <b>UCC</b>    | GGU           | GGT <b>UCC</b> cccctaaatgggggaaacacccccatggtATT                                             |
|              | <i>nad4-byp6</i>              | —          | +           | 42       | +       | GGA           | <b>CGA</b>    | GGU           | GGA <b>CGA</b> taatcccttataaggggggtatcttttattttatggTTA                                      |
|              | <i>nad4-byp7<sup>Δ</sup></i>  | —          | —           | 48       | +       | GGU           | <b>CGA</b>    | GGA           | GGT <b>CGA</b> ccaactttttaaagatggttacccttttattctttttaggaTTA                                 |
| <i>nad4L</i> | <i>nad4L-byp1</i>             | —          | +           | 48       | +       | GGA           | <b>CGA</b>    | GGU           | GGA <b>CGA</b> taataatcccttaataggggtattataaaaaattttaaaggTTA                                 |
|              | <i>nad4L-byp2</i>             | —          | +           | 42       | +       | GGU           | <b>CGA</b>    | GGA           | GGT <b>CGA</b> cttaaattttagtcaatcaaaaaataataaaaggatTTT                                      |
|              | <i>nad4L-byp3</i>             | +          | —           | 35       | +       | GGU           | <b>CGA</b>    | GGU           | GGT <b>CGA</b> atccaattagttggttctgtaaaaaaatggTTA                                            |
|              | <i>nad5-byp1</i>              | —          | +           | 36       | +       | GUU           | <b>UCC</b>    | GUA           | GTT <b>UCC</b> ccaactttttagaagatggaaataaaataagtaAAT                                         |
|              | <i>nad5-byp2</i>              | +          | +           | 50       | +       | GGA           | <b>CGA</b>    | GGU           | GGA <b>CGA</b> ttaactccactaagagggtggtgatttaattataataaaaggTAT                                |
|              | <i>nad5-byp3</i>              | —          | +           | 42       | +       | GGU           | <b>CGA</b>    | GGA           | GGT <b>CGA</b> tcaactttttaaagatgataaaaaataaaagggaTTA                                        |
|              | <i>nad5-byp4</i>              | +          | —           | 43       | +       | GCU           | <b>UCC</b>    | GCA           | GCT <b>UCC</b> tccaactttttaaagggtggttgaattatttttaaggcaACA                                   |
|              | <i>nad5-byp5</i>              | +          | +           | 38       | +       | GGA           | <b>UCC</b>    | GGA           | GGA <b>UCC</b> ccccttttagatgggggtataatctctcaggaTTA                                          |
|              | <i>nad5-byp6</i>              | —          | +           | 39       | +       | GGU           | <b>UCC</b>    | GGU           | GGT <b>UCC</b> caacttattttagtggtggttaaaaaataaaaggTATA                                       |
|              | <i>nad5-byp7</i>              | —          | —           | 38       | +       | GGA           | <b>UCC</b>    | GGU           | GGA <b>UCC</b> caactatttttagtggttgcacatttttttaggtGTT                                        |
| <i>nad5</i>  | <i>nad5-byp8</i>              | +          | —           | 41       | +       | GGU           | <b>CGA</b>    | GGU           | GGT <b>CGA</b> tataaccctttaaagggttatactcttttttttaggtTTT                                     |
|              | <i>nad5-byp9</i>              | +          | +           | 34       | +       | GGA           | <b>UCC</b>    | GGU           | GGA <b>UCC</b> cccctctatttagagggtatttaatttttaggtTTT                                         |
|              | <i>nad5-byp10</i>             | +          | +           | 34       | +       | AGU           | <b>UCC</b>    | AGU           | AGT <b>UCC</b> cccctttttaaagggggtataaaaaatagTATC                                            |



**Table S3. Mitochondrial codon frequencies in *Magnusiomyces capitatus***

| Amino acid | Codon | Count |
|------------|-------|-------|------------|-------|-------|------------|-------|-------|------------|-------|-------|
| F          | TTT   | 190   | S          | TCT   | 18    | Y          | TAT   | 238   | C          | TGT   | 29    |
| F          | TTC   | 108   | S          | TCC   | 0     | Y          | TAC   | 12    | C          | TGC   | 0     |
| L          | TTA   | 602   | S          | TCA   | 183   | *          | TAA   | 11    | W          | TGA   | 64    |
| L          | TTG   | 3     | S          | TCG   | 0     | *          | TAG   | 1     | W          | TGG   | 2     |
| L          | CTT   | 12    | P          | CCT   | 65    | H          | CAT   | 66    | R          | CGT   | 23    |
| L          | CTC   | 0     | P          | CCC   | 0     | H          | CAC   | 5     | R          | CGC   | 0     |
| L          | CTA   | 8     | P          | CCA   | 70    | Q          | CAA   | 72    | R          | CGA   | 0     |
| L          | CTG   | 0     | P          | CCG   | 0     | Q          | CAG   | 0     | R          | CGG   | 0     |
| I          | ATT   | 244   | T          | ACT   | 113   | N          | AAT   | 290   | S          | AGT   | 130   |
| I          | ATC   | 37    | T          | ACC   | 0     | N          | AAC   | 20    | S          | AGC   | 5     |
| I          | ATA   | 341   | T          | ACA   | 128   | K          | AAA   | 137   | R          | AGA   | 49    |
| M          | ATG   | 102   | T          | ACG   | 0     | K          | AAG   | 2     | R          | AGG   | 0     |
| V          | GTT   | 73    | A          | GCT   | 113   | D          | GAT   | 85    | G          | GGT   | 150   |
| V          | GTC   | 2     | A          | GCC   | 2     | D          | GAC   | 2     | G          | GGC   | 3     |
| V          | GTA   | 153   | A          | GCA   | 87    | E          | GAA   | 102   | G          | GGA   | 95    |
| V          | GTG   | 5     | A          | GCG   | 1     | E          | GAG   | 7     | G          | GGG   | 5     |

Numbers are calculated for codon regions across *atp6*, -8, and -9, *cob*, *cox1*, -2, and -3, *nad1*, -2, -3, -4, -4L, -5, and -6, and *rps3*, after exclusion of byps. Red, takeoff codons present in byps; green, other unused codons.

**Table S4. Mitochondrial codon frequencies in *Saccharomyces cerevisiae***

| Amino acid | Codon | Count |
|------------|-------|-------|------------|-------|-------|------------|-------|-------|------------|-------|-------|
| F          | TTT   | 81    | S          | TCT   | 39    | Y          | TAT   | 106   | C          | TGT   | 13    |
| F          | TTC   | 67    | S          | TCC   | 0     | Y          | TAC   | 11    | C          | TGC   | 1     |
| L          | TTA   | 285   | S          | TCA   | 78    | *          | TAA   | 8     | W          | TGA   | 38    |
| L          | TTG   | 2     | S          | TCG   | 0     | *          | TAG   | 0     | W          | TGG   | 1     |
| T          | CTT   | 6     | P          | CCT   | 46    | H          | CAT   | 53    | R          | CGT   | 1     |
| T          | CTC   | 0     | P          | CCC   | 3     | H          | CAC   | 5     | R          | CGC   | 0     |
| T          | CTA   | 19    | P          | CCA   | 36    | Q          | CAA   | 36    | R          | CGA   | 0     |
| T          | CTG   | 0     | P          | CCG   | 1     | Q          | CAG   | 5     | R          | CGG   | 1     |
| I          | ATT   | 193   | T          | ACT   | 40    | N          | AAT   | 196   | S          | AGT   | 25    |
| I          | ATC   | 29    | T          | ACC   | 1     | N          | AAC   | 12    | S          | AGC   | 0     |
| M          | ATA   | 38    | T          | ACA   | 53    | K          | AAA   | 70    | R          | AGA   | 42    |
| M          | ATG   | 72    | T          | ACG   | 0     | K          | AAG   | 3     | R          | AGG   | 0     |
| V          | GTT   | 50    | A          | GCT   | 66    | D          | GAT   | 53    | G          | GGT   | 99    |
| V          | GTC   | 7     | A          | GCC   | 7     | D          | GAC   | 2     | G          | GGC   | 1     |
| V          | GTA   | 83    | A          | GCA   | 54    | E          | GAA   | 41    | G          | GGA   | 31    |
| V          | GTG   | 5     | A          | GCG   | 4     | E          | GAG   | 3     | G          | GGG   | 6     |

Based on the reduced mitochondrial gene set in this yeast, including *atp6*, -8, and -9, *cob*, *cox1*, -2, and -3, and *rps3*. Green, unused codons.

**Table S5. Mitochondrial codon frequencies in *Kluyveromyces lactis***

| Amino acid | Codon | Count |
|------------|-------|-------|------------|-------|-------|------------|-------|-------|------------|-------|-------|
| F          | TTT   | 70    | S          | TCT   | 35    | Y          | TAT   | 100   | C          | TGT   | 13    |
| F          | TTC   | 88    | S          | TCC   | 1     | Y          | TAC   | 12    | C          | TGC   | 1     |
| L          | TTA   | 283   | S          | TCA   | 96    | *          | TAA   | 8     | W          | TGA   | 40    |
| L          | TTG   | 2     | S          | TCG   | 1     | *          | TAG   | 0     | W          | TGG   | 0     |
| T          | CTT   | 0     | P          | CCT   | 49    | H          | CAT   | 54    | R          | CGT   | 0     |
| T          | CTC   | 0     | P          | CCC   | 4     | H          | CAC   | 2     | R          | CGC   | 0     |
| T          | CTA   | 0     | P          | CCA   | 35    | Q          | CAA   | 48    | R          | CGA   | 0     |
| T          | CTG   | 0     | P          | CCG   | 1     | Q          | CAG   | 0     | R          | CGG   | 0     |
| I          | ATT   | 212   | T          | ACT   | 41    | N          | AAT   | 154   | S          | AGT   | 27    |
| I          | ATC   | 16    | T          | ACC   | 0     | N          | AAC   | 13    | S          | AGC   | 2     |
| M          | ATA   | 3     | T          | ACA   | 65    | K          | AAA   | 75    | R          | AGA   | 46    |
| M          | ATG   | 63    | T          | ACG   | 0     | K          | AAG   | 1     | R          | AGG   | 1     |
| V          | GTT   | 50    | A          | GCT   | 70    | D          | GAT   | 49    | G          | GGT   | 86    |
| V          | GTC   | 2     | A          | GCC   | 4     | D          | GAC   | 2     | G          | GGC   | 1     |
| V          | GTA   | 101   | A          | GCA   | 50    | E          | GAA   | 47    | G          | GGA   | 53    |
| V          | GTG   | 1     | A          | GCG   | 3     | E          | GAG   | 2     | G          | GGG   | 2     |

Based on the reduced mitochondrial gene set in this yeast, including *atp6*, -8, and -9, *cob*, *cox1*, -2, and -3, and *rps3*. Green, unused codons.

**Table S6. Mitochondrial codon frequencies in *Lachancea thermotolerans***

| Amino acid | Codon | Count |
|------------|-------|-------|------------|-------|-------|------------|-------|-------|------------|-------|-------|
| F          | TTT   | 85    | S          | TCT   | 41    | Y          | TAT   | 93    | C          | TGT   | 16    |
| F          | TTC   | 72    | S          | TCC   | 0     | Y          | TAC   | 27    | C          | TGC   | 0     |
| L          | TTA   | 303   | S          | TCA   | 82    | *          | TAA   | 6     | W          | TGA   | 41    |
| L          | TTG   | 1     | S          | TCG   | 0     | *          | TAG   | 2     | W          | TGG   | 0     |
| T          | CTT   | 5     | P          | CCT   | 56    | H          | CAT   | 49    | R          | CGT   | 2     |
| T          | CTC   | 0     | P          | CCC   | 1     | H          | CAC   | 5     | R          | CGC   | 0     |
| T          | CTA   | 11    | P          | CCA   | 27    | Q          | CAA   | 47    | R          | CGA   | 0     |
| T          | CTG   | 0     | P          | CCG   | 0     | Q          | CAG   | 0     | R          | CGG   | 0     |
| I          | ATT   | 204   | T          | ACT   | 39    | N          | AAT   | 142   | S          | AGT   | 30    |
| I          | ATC   | 17    | T          | ACC   | 0     | N          | AAC   | 16    | S          | AGC   | 3     |
| M          | ATA   | 2     | T          | ACA   | 63    | K          | AAA   | 76    | R          | AGA   | 44    |
| M          | ATG   | 56    | T          | ACG   | 0     | K          | AAG   | 1     | R          | AGG   | 0     |
| V          | GTT   | 51    | A          | GCT   | 88    | D          | GAT   | 51    | G          | GGT   | 82    |
| V          | GTC   | 1     | A          | GCC   | 5     | D          | GAC   | 2     | G          | GGC   | 0     |
| V          | GTA   | 103   | A          | GCA   | 50    | E          | GAA   | 49    | G          | GGA   | 53    |
| V          | GTG   | 1     | A          | GCG   | 0     | E          | GAG   | 1     | G          | GGG   | 2     |

Based on the reduced mitochondrial gene set in this yeast, including *atp6*, -8, and -9, *cob*, *cox1*, -2, and -3, and *rps3*. Green, unused codons.

**Table S7. Mitochondrial codon frequencies in *Magnusiomyces magnusii* strain 270**

| Amino acid | Codon | Count |
|------------|-------|-------|------------|-------|-------|------------|-------|-------|------------|-------|-------|
| F          | TTT   | 36    | S          | TCT   | 102   | Y          | TAT   | 48    | C          | TGT   | 32    |
| F          | TTC   | 305   | S          | TCC   | 20    | Y          | TAC   | 198   | C          | TGC   | 2     |
| L          | TTA   | 52    | S          | TCA   | 86    | *          | TAA   | 8     | W          | TGA   | 62    |
| L          | TTG   | 3     | S          | TCG   | 9     | *          | TAG   | 7     | W          | TGG   | 2     |
| L          | CTT   | 217   | P          | CCT   | 76    | H          | CAT   | 29    | R          | CGT   | 35    |
| L          | CTC   | 55    | P          | CCC   | 2     | H          | CAC   | 51    | R          | CGC   | 0     |
| L          | CTA   | 220   | P          | CCA   | 62    | Q          | CAA   | 76    | R          | CGA   | 0     |
| L          | CTG   | 152   | P          | CCG   | 7     | Q          | CAG   | 30    | R          | CGG   | 4     |
| I          | ATT   | 95    | T          | ACT   | 80    | N          | AAT   | 32    | S          | AGT   | 87    |
| I          | ATC   | 420   | T          | ACC   | 2     | N          | AAC   | 214   | S          | AGC   | 84    |
| I          | ATA   | 5     | T          | ACA   | 169   | K          | AAA   | 75    | R          | AGA   | 51    |
| M          | ATG   | 108   | T          | ACG   | 1     | K          | AAG   | 49    | R          | AGG   | 0     |
| V          | GTT   | 91    | A          | GCT   | 71    | D          | GAT   | 38    | G          | GGT   | 71    |
| V          | GTC   | 33    | A          | GCC   | 81    | D          | GAC   | 57    | G          | GGC   | 6     |
| V          | GTA   | 113   | A          | GCA   | 94    | E          | GAA   | 20    | G          | GGA   | 148   |
| V          | GTG   | 122   | A          | GCG   | 32    | E          | GAG   | 95    | G          | GGG   | 91    |

Numbers are calculated for codon regions across *atp6*, -8, and -9, *cob*, *cox1*, -2, and -3, *nad1*, -2, -3, -4, -4L, -5, and -6, and *rps3*. Green, unused codons.

**Table S8. Mitochondrial codon frequencies in *Yarrowia lipolytica***

| Amino acid | Codon | Count |
|------------|-------|-------|------------|-------|-------|------------|-------|-------|------------|-------|-------|
| F          | TTT   | 160   | S          | TCT   | 78    | Y          | TAT   | 190   | C          | TGT   | 30    |
| F          | TTC   | 160   | S          | TCC   | 1     | Y          | TAC   | 40    | C          | TGC   | 0     |
| L          | TTA   | 610   | S          | TCA   | 149   | *          | TAA   | 12    | W          | TGA   | 55    |
| L          | TTG   | 7     | S          | TCG   | 3     | *          | TAG   | 2     | W          | TGG   | 2     |
| L          | CTT   | 19    | P          | CCT   | 65    | H          | CAT   | 58    | R          | CGT   | 0     |
| L          | CTC   | 0     | P          | CCC   | 1     | H          | CAC   | 23    | R          | CGC   | 0     |
| L          | CTA   | 24    | P          | CCA   | 67    | Q          | CAA   | 67    | R          | CGA   | 0     |
| L          | CTG   | 1     | P          | CCG   | 1     | Q          | CAG   | 0     | R          | CGG   | 0     |
| I          | ATT   | 173   | T          | ACT   | 105   | N          | AAT   | 186   | S          | AGT   | 98    |
| I          | ATC   | 87    | T          | ACC   | 0     | N          | AAC   | 46    | S          | AGC   | 4     |
| I          | ATA   | 277   | T          | ACA   | 128   | K          | AAA   | 80    | R          | AGA   | 75    |
| M          | ATG   | 118   | T          | ACG   | 0     | K          | AAG   | 5     | R          | AGG   | 0     |
| V          | GTT   | 89    | A          | GCT   | 162   | D          | GAT   | 83    | G          | GGT   | 168   |
| V          | GTC   | 4     | A          | GCC   | 10    | D          | GAC   | 9     | G          | GGC   | 0     |
| V          | GTA   | 159   | A          | GCA   | 84    | E          | GAA   | 61    | G          | GGA   | 83    |
| V          | GTG   | 10    | A          | GCG   | 3     | E          | GAG   | 28    | G          | GGG   | 4     |

Numbers are calculated for codon regions across *atp6*, -8, and -9, *cob*, *cox1*, -2, and -3, *nad1*, -2, -3, -4, -4L, -5, and -6, and *rps3*. Green, unused codons.

**Table S9. Expression of *nad4L*-byp1 in *E. coli***

| <i>LacZ</i> construct                                              | Colony numbers |      | % of control |
|--------------------------------------------------------------------|----------------|------|--------------|
|                                                                    | White          | Blue |              |
| pUC19 (control)                                                    | 0              | 231  | 100          |
| Original byp with prepeptide                                       | 3              | 0    | 1            |
| Modified byp with CGA (avoided codon) replaced by TGA (stop codon) | 10             | 3    | 5            |
| Modified byp with CGA replaced by TGA; no prepeptide               | 10             | 2    | 5            |
| Modified byp with TTCG tetraloop; SD motif; no prepeptide          | 5              | 1    | 3            |

Cloning experiment was repeated three times; numbers of colonies are rounded to the nearest integer. Essentially the same results were obtained for *cox1*-byp1. For details, see *S1 Materials and Methods*.
